# Supplementary material for: Role of CDK4/6 inhibitors in patients with hormone receptor (HR)-positive, human epidermal receptor-2 negative (HER-2) metastatic breast cancer study protocol for a systematic review, network meta-analysis and cost-effectiveness analysis
Source: HighWire-hosted journal article supplement (doi:10.1136/bmjopen-2021-056374), 2022-05-01
Supplement: bmjopen-2021-056374supp001_data_supplement.pdf [file bmjopen-2021-056374supp001_data_supplement.pdf]

P1:

Embase

#1: breast cancer/

#2: breast ancer.mp.

#3: #1 OR #2

#4: palbociclib/

#5: palbociclib.mp.

#6: #4 OR #5

#7: ribociclib/

#8: ribociclib.mp.

#9: #7 OR #8

#10: abemaciclib/

#11: abemaciclib.mp.

#12: #10 OR #11

#13: dalpiciclib.mp.

#14: #6 OR #9 OR #12 OR #13

#15: "randomized controlled trial (topic)"/

#16: Randomized Controlled Trials.mp.

#17: #15 OR #16

#18:#3 AND #14 AND #17

P2: Cochrane Library

#1: MeSH descriptor: [Breast Neoplasms] explode all trees

#2: (palbociclib):ti,ab,kw OR (ribociclib):ti,ab,kw OR (abemaciclib):ti,ab,kw OR (dalpiciclib):ti,ab,kw

#3: MeSH descriptor: [Randomized Controlled Trials as Topic] explode all trees

#4: #1 AND #2 AND #3
